# Supplementary material for: Hetero-arylboroxines: the first rational synthesis, X-ray crystallographic and computational analysis
Source: Royal Society of Chemistry journal article supplement (doi:10.1039/b804705g), 2008-01-01
Supplement: b804705g.pdf [file b804705g.pdf]

## Supporting Information

### **Hetero-arylboroxines: The First Rational Synthesis, X-ray Crystallographic and Computational Analysis**

*Peter M. Iovine\**, Charles R. Gyselbrecht, Emily K. Perttu, Cole Klick, Alexander Neuwelt, Jason Loera, Antonio G. DiPasquale, Arnold L. Rheingold, and Jeremy Kua

[\*] Prof. Peter M. Iovine, Charles R. Gyselbrecht, Cole Klick, Alexander Neuwelt, Emily K. Perttu, and Prof. Jeremy Kua  
Department of Chemistry and Biochemistry  
University of San Diego  
5998 Alcalá Park, San Diego, CA 92110  
Phone: (619)-260-4028  
Fax: (619)-260-2211  
E-mail: [piovine@san Diego.edu](mailto:piovine@san Diego.edu)  
Homepage: <http://www.sandiego.edu/~piovine>

Dr. Antonio G. DiPasquale, Prof. Arnold L. Rheingold  
Department of Chemistry and Biochemistry  
University of California, San Diego  
La Jolla, CA 92093

*General.* NMR data was acquired on either a 400 MHz Varian Mercury or a 500 MHz Varian INOVA system.  $^1\text{H}$  NMR spectra are referenced to the deuterated solvent;  $^{19}\text{F}$  chemical shifts are referenced to  $\text{CCl}_3\text{F}$ . The relaxation delay for  $^{19}\text{F}$  acquisition was set to ten seconds. 4-Fluorophenylboronic acid, 2-((dimethylamino)methyl)phenylboronic acid, 4-methoxyphenylboronic acid, 4-acetylphenylboronic acid were purchased from Frontier Scientific and used as received.  $\text{CDCl}_3$  was stored over 4 Å molecular sieves and  $\text{K}_2\text{CO}_3$ .

*General procedure for the preparation of 3a-c.* To a 25 mL round bottom flask was added 0.6 mmol of 2-((dimethylamino)methyl)phenylboronic acid (**1**) and 1.2 mmol of either **2a**, **2b**, or **2c**. Anhydrous toluene was added to the solids to give a 0.05 M solution relative to compound **1**. Magnesium sulfate (approximately 200-300 mg) was added and the heterogeneous solution refluxed for 24 hours. The reaction mixture was cooled, filtered, and concentrated to dryness yielding a white solid. The white solid was taken up in hot anhydrous 1,2-dichloroethane (3 mL) and transferred into culture tubes (6 x 50 mm) that were subsequently placed inside a 20 mL scintillation vial containing pentane. The 20 mL scintillation vial was capped and the crystals were left to grow over a period of one to two weeks.

*Computational Methods.* All calculations were carried out using Jaguar 6.0<sup>[1]</sup> at the B3LYP<sup>[2-5]</sup> flavor of density functional theory with a 6-311+G\* basis set. We chose to run our calculations at a similar level of theory and basis set to complement our previous studies.<sup>[6, 7]</sup> As in our previous studies, the Poisson-Boltzmann (PB) continuum approximation<sup>[8, 9]</sup> was used to describe the effect of solvent. The parameters used for the dielectric constant and probe radius are  $\epsilon = 4.8$  and  $R_{\text{solv}} = 2.50$  Å for chloroform. Zero-point vibration and thermal enthalpy corrections were included based on calculating the analytical Hessian. Thus, our calculated  $\Delta H$  values represent the solution phase enthalpy. Entropy and free-energy corrections are not included for reasons discussed previously.<sup>[6]</sup>

**Crystal Data 3a.** The data were integrated using the Brüker SAINT software program and scaled using the SADABS software program.<sup>[10]</sup> Solution by direct methods (SIR-2004) produced a complete heavy-atom phasing model consistent with the proposed structure. All non-hydrogen atoms were refined anisotropically by full-matrix least-squares (SHELXL-97).<sup>[11]</sup> All hydrogen atoms were placed using a riding model. Their positions were constrained relative to their parent atom using the appropriate HFIX command in SHELXL-97. CCDC-671272 contains the supplementary crystallographic data for this paper. These data can be obtained free of charge from the Cambridge Crystallographic Data Centre.

**Crystal Data 3b.** The data were integrated using the Brüker SAINT software program and scaled using the SADABS software program.<sup>[10]</sup> Solution by direct methods (SIR-2004) produced a complete heavy-atom phasing model consistent with the proposed structure. All non-hydrogen atoms were refined anisotropically by full-matrix least-squares (SHELXL-97).<sup>[11]</sup> All hydrogen atoms were placed using a riding model. Their positions were constrained relative to their parent atom using the appropriate HFIX command in SHELXL-97. CCDC-671273 contains the supplementary crystallographic data for this paper. These data can be obtained free of charge from the Cambridge Crystallographic Data Centre.

**Crystal Data 3c.** The data were integrated using the Brüker SAINT software program and scaled using the SADABS software program.<sup>[10]</sup> Solution by direct methods (SIR-2004) produced a complete heavy-atom phasing model consistent with the proposed structure. All non-hydrogen atoms were refined anisotropically by full-matrix least-squares (SHELXL-97).<sup>[11]</sup> All hydrogen atoms were placed using a riding model. Their positions were constrained relative to their parent atom using the appropriate HFIX command in SHELXL-97. CCDC-671274 contains the supplementary crystallographic data for this paper. These data can be obtained free of charge from the Cambridge Crystallographic Data Centre.

**Figure S1.**  $^1\text{H}$  NMR ( $\text{CDCl}_3$ ,  $25^\circ\text{C}$ ) spectra showing the room temperature scrambling of hetero-arylboroxine **3c** upon addition of 4-methoxyphenylboronic acid.

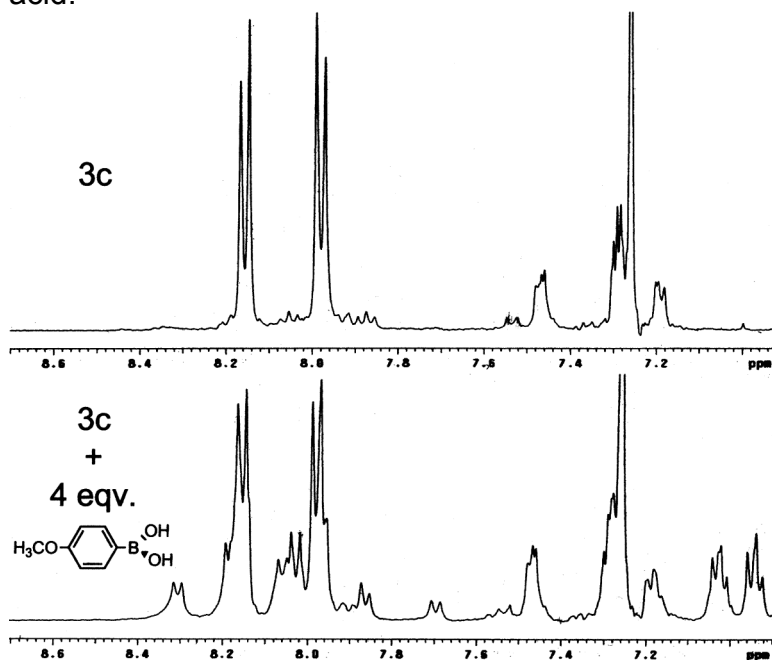

**Table S1.** Comparison of X-ray crystallographic properties of **3a**, **3b**, and **3c**.

|                                                                  | <b>3a</b>   | <b>3b</b>   | <b>3c</b>  |
|------------------------------------------------------------------|-------------|-------------|------------|
| $\text{sp}^3\text{B-N}$ Bond Length ( $\text{\AA}$ )             | 1.695 (3)   | 1.701 (2)   | 1.680 (4)  |
| $\text{B}_3\text{O}_3$ -Phenyl Ring Dihedral Angles ( $^\circ$ ) | 4.8/2.1     | 10.7/12.0   | 6.1/3.6    |
| O- $\text{sp}^3\text{B-O}$ Bond Angle ( $^\circ$ )               | 113.19 (17) | 113.18 (13) | 112.90 (2) |
| Avg O- $\text{sp}^2\text{B-O}$ Bond Angle ( $^\circ$ )           | 120.69      | 120.57      | 121.28     |
| Avg $\text{sp}^3\text{B-O}$ Bond Length ( $\text{\AA}$ )         | 1.45        | 1.45        | 1.45       |
| Avg $\text{sp}^2\text{B-O}$ Bond Length ( $\text{\AA}$ )         | 1.36        | 1.37        | 1.37       |

**Table S2.** Enthalpy for the formation of arylboroxines of the structural type B<sub>3</sub>, AB<sub>2</sub>, A<sub>2</sub>B, and A<sub>3</sub> where A is arylboronic acid monomer **1** and B represents non-coordinating arylboronic acid monomers **2a-c**.

| Reaction                                                     | $\Delta E_{\text{elec}}$<br>(kcal/mol) | $\Delta E_{\text{solv}}$<br>(kcal/mol) | $\Delta E_{\text{corr}}$<br>(kcal/mol) | $\Delta H^{\circ}_{\text{soln}}$<br>(kcal/mol) |
|--------------------------------------------------------------|----------------------------------------|----------------------------------------|----------------------------------------|------------------------------------------------|
| 3B → B <sub>3</sub> ( <b>4a</b> ) + 3H <sub>2</sub> O        | 12.59                                  | -5.44                                  | -2.77                                  | 4.38                                           |
| A + 2B → AB <sub>2</sub> ( <b>3a</b> ) + 3H <sub>2</sub> O   | 7.12                                   | -7.37                                  | -2.31                                  | -2.56                                          |
| 2A + B → A <sub>2</sub> B ( <b>5a'</b> ) + 3H <sub>2</sub> O | 11.80                                  | -7.50                                  | -2.24                                  | 2.06                                           |
| 2A + B → A <sub>2</sub> B ( <b>5a</b> ) + 3H <sub>2</sub> O  | 7.86                                   | -5.78                                  | -2.18                                  | -0.10                                          |
| 3A → A <sub>3</sub> ( <b>6'</b> ) + 3H <sub>2</sub> O        | 24.61                                  | -5.37                                  | -3.99                                  | 15.25                                          |
| 3A → A <sub>3</sub> ( <b>6</b> ) + 3H <sub>2</sub> O         | 13.90                                  | -5.00                                  | -2.40                                  | 6.50                                           |
| 3B → B <sub>3</sub> ( <b>4b</b> ) + 3H <sub>2</sub> O        | 12.43                                  | -5.55                                  | -2.80                                  | 4.09                                           |
| A + 2B → AB <sub>2</sub> ( <b>3b</b> ) + 3H <sub>2</sub> O   | 8.48                                   | -7.37                                  | -2.38                                  | -1.26                                          |
| 2A + B → A <sub>2</sub> B ( <b>5b'</b> ) + 3H <sub>2</sub> O | 13.08                                  | -7.73                                  | -2.29                                  | 3.06                                           |
| 2A + B → A <sub>2</sub> B ( <b>5b</b> ) + 3H <sub>2</sub> O  | 9.73                                   | -6.16                                  | -2.35                                  | 1.22                                           |
| 3B → B <sub>3</sub> ( <b>4c</b> ) + 3H <sub>2</sub> O        | 14.69                                  | -5.57                                  | -1.05                                  | 8.07                                           |
| A + 2B → AB <sub>2</sub> ( <b>3c</b> ) + 3H <sub>2</sub> O   | 7.72                                   | -7.64                                  | -1.07                                  | -0.99                                          |
| 2A + B → A <sub>2</sub> B ( <b>5c'</b> ) + 3H <sub>2</sub> O | 11.68                                  | -7.64                                  | -1.57                                  | 2.47                                           |
| 2A + B → A <sub>2</sub> B ( <b>5c</b> ) + 3H <sub>2</sub> O  | 8.19                                   | -6.54                                  | -1.55                                  | 0.11                                           |

**Table S3.** Standard enthalpies for products and reactants in boronic trimer formation adjusted to 298 K solvated in chloroform.

| Molecule         | $E_{\text{elec}}$<br>(kcal/mol) | $E_{\text{solv}}$<br>(kcal/mol) | $E_{\text{corr}}$<br>(kcal/mol) | $H^{\circ}_{\text{soln}}$<br>(kcal/mol) |
|------------------|---------------------------------|---------------------------------|---------------------------------|-----------------------------------------|
| <b>2a</b>        | -318551.09                      | -9.17                           | 79.09                           | -318481.16                              |
| <b>1</b>         | -365012.94                      | -9.78                           | 150.59                          | -364872.12                              |
| <b>2b</b>        | -328142.50                      | -10.41                          | 105.79                          | -328047.12                              |
| <b>2c</b>        | -352070.62                      | -11.88                          | 108.74                          | -351973.76                              |
| <b>4a</b>        | -811733.00                      | -7.46                           | 187.45                          | -811553.01                              |
| <b>4b</b>        | -840507.38                      | -11.29                          | 267.52                          | -840251.16                              |
| <b>4c</b>        | -912289.49                      | -15.74                          | 278.12                          | -912027.11                              |
| <b>3a</b>        | -858200.32                      | -10.00                          | 259.41                          | -857950.91                              |
| <b>3b</b>        | -877381.77                      | -12.48                          | 312.74                          | -877081.52                              |
| <b>3c</b>        | -925238.78                      | -15.70                          | 319.95                          | -924934.53                              |
| <b>5a'</b>       | -904657.49                      | -10.74                          | 330.98                          | -904337.25                              |
| <b>5a</b>        | -904661.43                      | -9.02                           | 331.04                          | -904339.40                              |
| <b>5b'</b>       | -914247.62                      | -12.21                          | 357.63                          | -913902.20                              |
| <b>5b</b>        | -914250.97                      | -10.65                          | 357.57                          | -913904.04                              |
| <b>5c'</b>       | -938177.14                      | -13.60                          | 361.30                          | -937829.44                              |
| <b>5c</b>        | -938180.62                      | -12.50                          | 361.32                          | -937831.80                              |
| <b>6'</b>        | -951106.53                      | -9.22                           | 400.73                          | -950715.02                              |
| <b>6</b>         | -951117.24                      | -8.84                           | 402.32                          | -950723.76                              |
| H <sub>2</sub> O | -47969.22                       | -8.49                           | 15.68                           | -47962.03                               |

## References

- [1] Jaguar v6.0; Schrödinger, LLC: Portland, OR, 2005
- [2] A. D. Becke, *Phys. Rev. A*. **1988**, *38*, 3098.
- [3] A. D. Becke, *J. Chem. Phys.* **1993**, *98*, 5648.
- [4] C. Lee, *Phys. Rev. B*. **1988**, *37*, 785.
- [5] S. H. Vosko, L. Wilk, M. Nusair, *Can. J. Phys.* **1980**, *58*, 1200.
- [6] J. Kua, M. N. Fletcher, P. M. Iovine, *J. Phys. Chem. A*. **2006**, *110*, 8158.
- [7] J. Kua, P. M. Iovine, *J. Phys. Chem. A*. **2005**, *109*, 8938.
- [8] B. Marten, K. Kim, C. Cortis, R. A. Friesner, R. B. Murphy, M. N. Ringnalda, D. Sitkoff, B. Honig, *J. Phys. Chem.* **1996**, *100*, 11775.
- [9] D. J. Tannor, *J. Am. Chem. Soc.* **1994**, *116*, 11875.
- [10] SADABS, University of Göttingen, Göttingen, Germany, **1997**.
- [11] G. M. Sheldrick, SHELX-97, Programs for Crystal Structure Analysis, University of Göttingen, Göttingen, Germany, **1997**.
